# Supplementary material
Source: PubMed Central journal article supplement (PMC3073370)
Supplement: NIHMS280232-supplement-Table_1.pdf [file NIHMS280232-supplement-Table_1.pdf]

Supplemental Table 1:

Assessment of metastases to liver and peritoneum in an orthotopic injection model of L3.6pl

xenografts:

| Regimen           | Control       | Cyclopamine |
|-------------------|---------------|-------------|
| Number of animals | 9             | 9           |
| Liver             | 9/9<br>(100%) | 0/9<br>(0%) |
| Peritoneum        | 4/9<br>(44%)  | 0/9<br>(0%) |

Legend to supplemental figure 1:

Treatment of L3.6pl cells with cyclopamine (6  $\mu$ M) for 4 days in 0.5% FBS lead to significant downregulation of *Gli1* mRNA *in vitro* (A). After treatment of orthotopic L3.6pl xenografts with cyclopamine for 15 days, significant growth inhibition of the primary tumors was observed *in vivo* (B). Graph (B) shows average tumor weights at the end of treatment. Using orthotopic L3.6pl xenografts, liver metastases were found in all control animals at the end of treatment (C). Supplemental figure 2D shows a histological image of one representative liver metastasis.
