# Supplementary material
Source: PubMed Central journal article supplement (PMC3073370)

# Supplemental Figure 1

A)

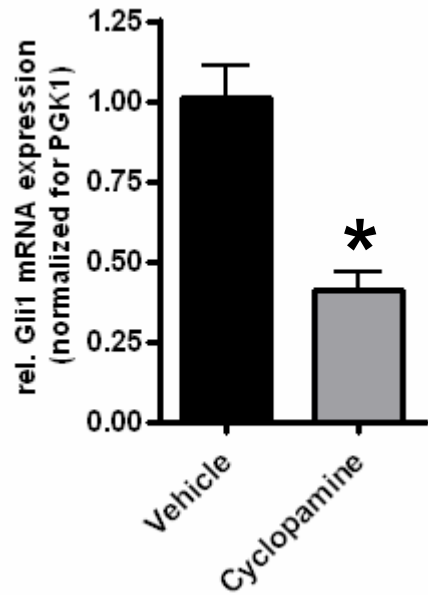

B)

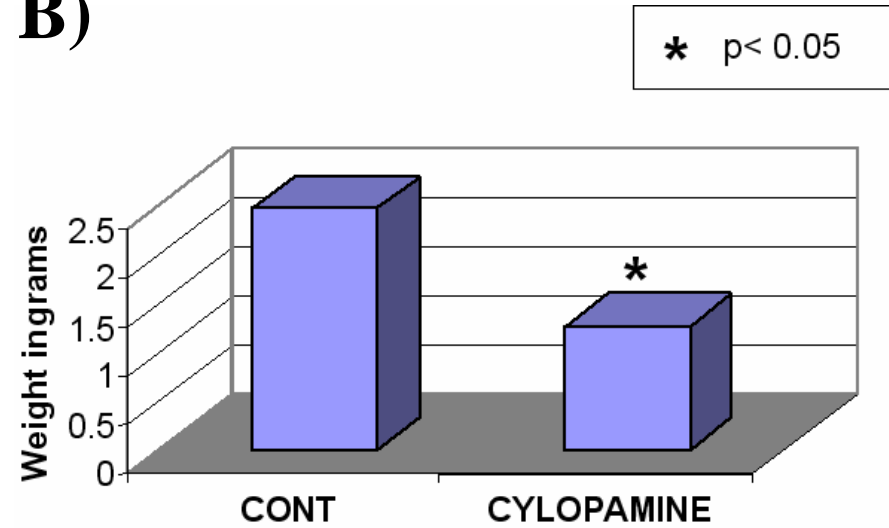

C)

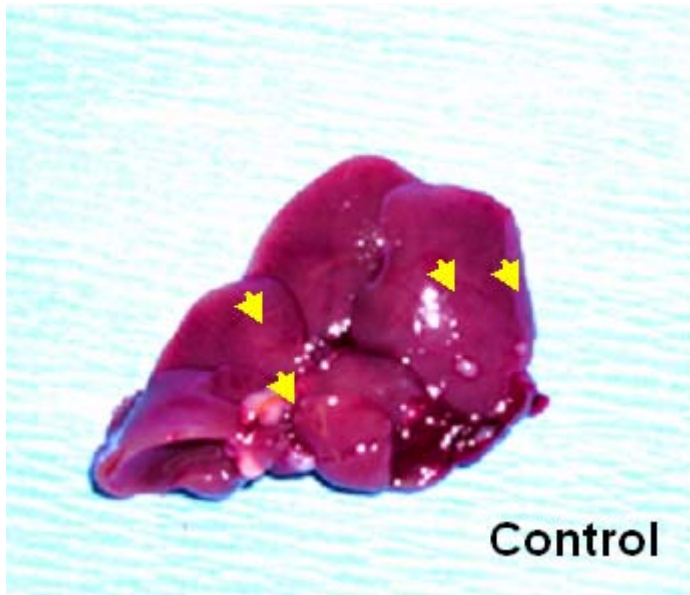

D)

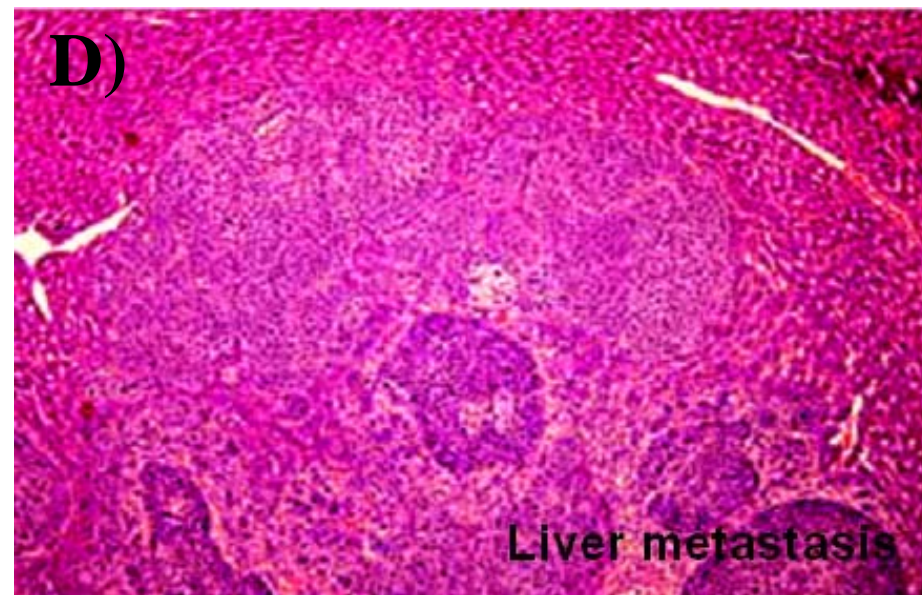

Supplement: NIHMS280232-supplement-Supplemental_Figure_1.pdf [file NIHMS280232-supplement-Supplemental_Figure_1.pdf]
